# Supplementary material
Source: PubMed Central journal article supplement (PMC6451698)
Supplement: mmc1.pdf [file mmc1.pdf]

**Supplemental Data**

***ELP1* Splicing Correction Reverses**

**Proprioceptive Sensory Loss in Familial Dysautonomia**

Elisabetta Morini, Dadi Gao, Connor M. Montgomery, Monica Salani, Chiara Mazzasette, Tobias A. Krussig, Brooke Swain, Paula Dietrich, Jana Narasimhan, Vijayalakshmi Gabbeta, Amal Dakka, Jean Hedrick, Xin Zhao, Marla Weetall, Nikolai A. Naryshkin, Gregory G. Wojtkiewicz, Chien-Ping Ko, Michael E. Talkowski, Ioannis Dragatsis, and Susan A. Slaughaupt

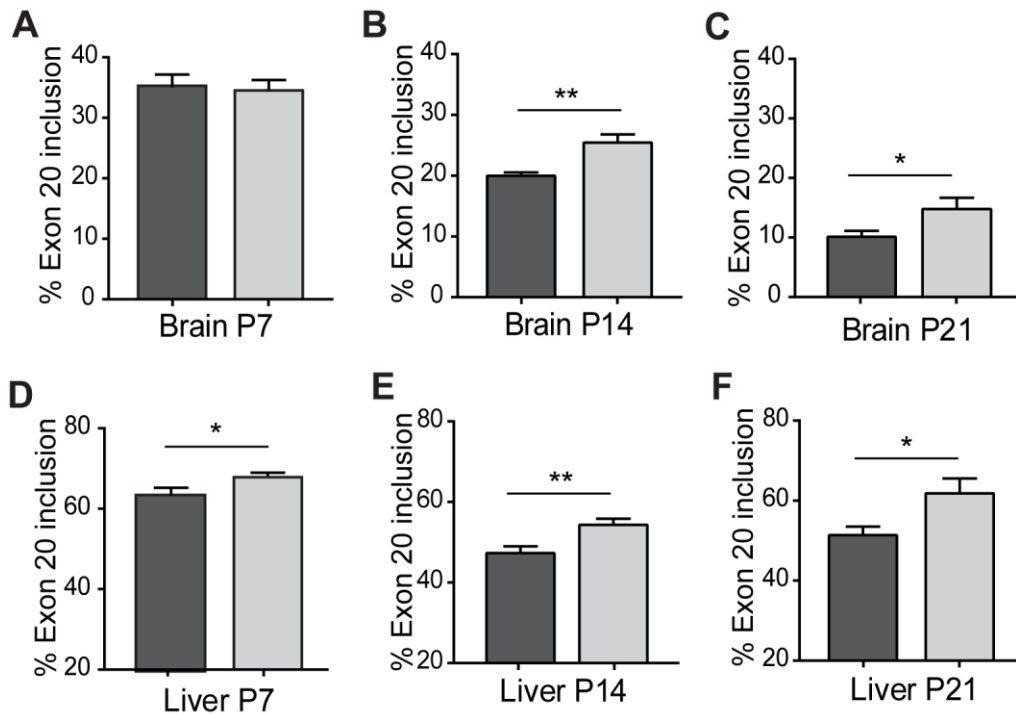

**Figure S1. Kinetin treatment improves *ELPI* splicing in nursing pups.** At the day of delivery the dams were randomly assigned to vehicle diet or kinetin diet, and, continued to be fed these diets until the time of weaning. *ELPI* splicing was analyzed in nursing pups carrying the human transgene with the major FD splicing mutation, *TgFD9*. (A-F) Percent of exon 20 inclusion in vehicle-assigned (dark grey) and kinetin-assigned (light grey) *TgFD9* pups. (A) In brain at P7 no significant differences were detected in percent of exon 20 inclusion ( $P = 0.73$ ) between vehicle-assigned ( $n=5$ ) and kinetin-assigned ( $n=7$ ) *TgFD9* pups, two-tailed unpaired Student's *t*-test. (B) In brain at P14 a significant difference of  $**P < 0.01$  was detected in percent of exon 20 inclusion between vehicle-assigned ( $n=5$ ) and kinetin-assigned ( $n=8$ ) *TgFD9* pups, two-tailed unpaired Student's *t*-test. (C) In brain at P21, weaning time, a significant difference of  $*P < 0.05$  was detected in percent of exon 20 inclusion between vehicle-assigned ( $n=5$ ) and kinetin-assigned ( $n=6$ ) *TgFD9* pups, two-tailed unpaired Student's *t*-test. (D) In liver at P7 a significant

difference of  $*P < 0.05$  was detected in percent of exon 20 inclusion between vehicle-assigned (n=5) and kinetin-assigned (n= 7) *TgFD9* pups, two-tailed unpaired Student's *t*-test. (E) In liver at P14 a significant difference of  $**P < 0.01$  was detected in percent of exon 20 inclusion between vehicle-assigned (n=5) and kinetin-assigned (n= 8) *TgFD9* pups, two-tailed unpaired Student's *t*-test. (F) In liver at P21, weaning time, a significant difference of  $*P < 0.05$  was detected in percent of exon 20 inclusion between vehicle-assigned (n=5) and kinetin-assigned (n= 6) *TgFD9* pups, two-tailed unpaired Student's *t*-test. Means and s.e.m. are shown.

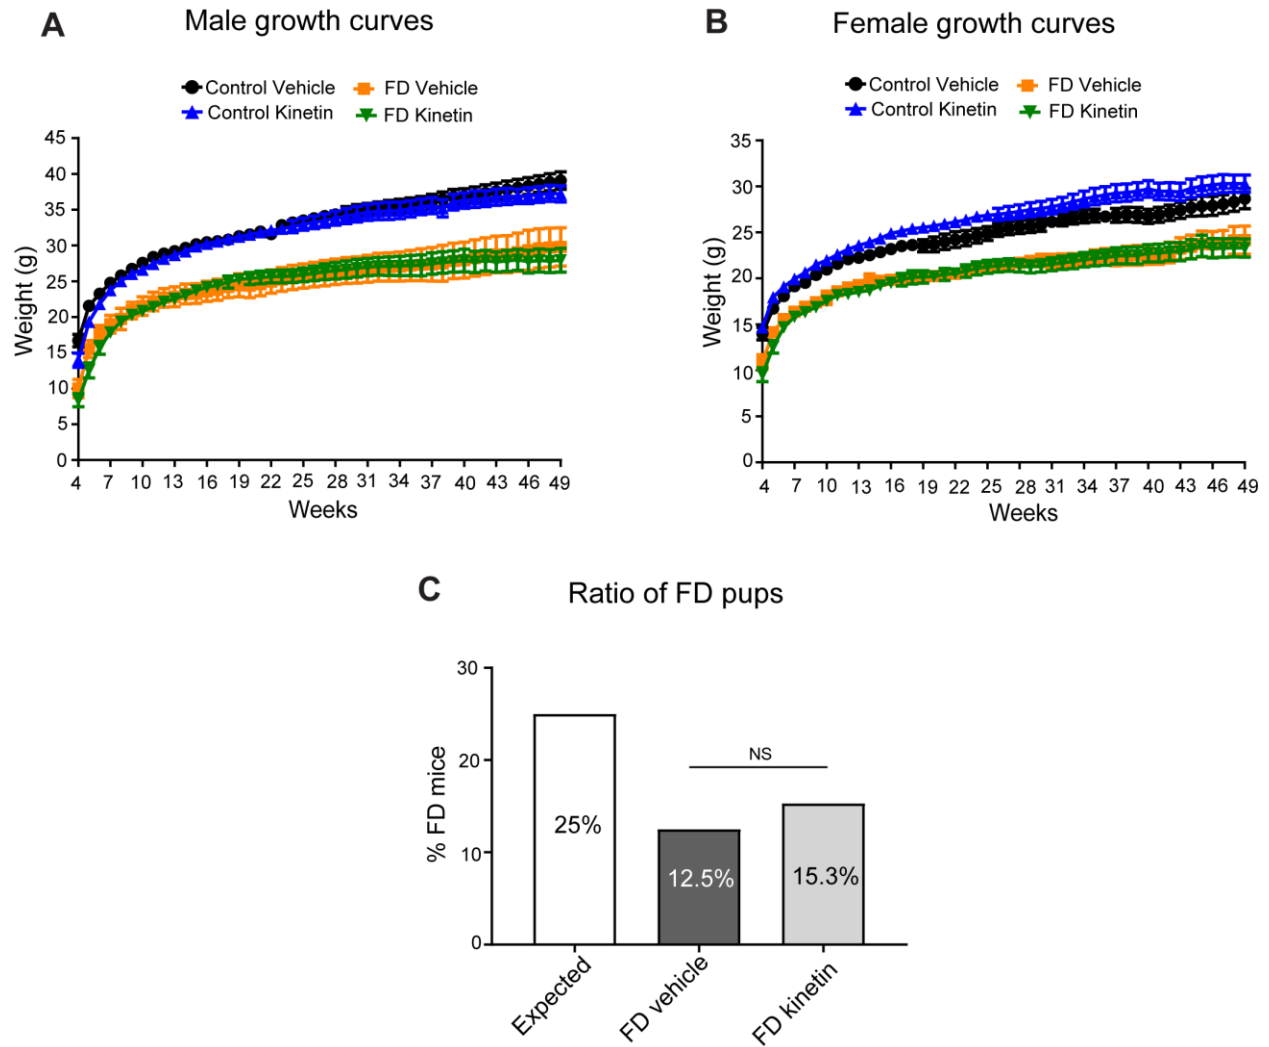

**Figure S2. Kinetic treatment did not affect growth or ratio of the FD mice.** (A) Postnatal growth curves for vehicle-treated (n=12, black), kinetin-treated (n=16, blue) control male mice and vehicle-treated (n=7, orange), kinetin-treated (n=11, green) FD male mice. (B) Postnatal growth curves for vehicle-treated (n=13, black), kinetin-treated (n=18, blue) control female mice and vehicle-treated (n=12, orange), kinetin-treated (n=15, green) FD female mice. Means and s.e.m. are shown. (C) The expected Mendelian ratio of *TgFD9; Ikbkap<sup>Δ20/flox</sup>* mice obtained by crossing *TgFD9; Ikbkap<sup>flox/flox</sup>* mice × *Ikbkap<sup>Δ20/+</sup>* mice is 25% (white bar). The observed ratio was 12.5% (38/305) for the vehicle-treated *TgFD9; Ikbkap<sup>Δ20/flox</sup>* mice (dark grey bar) and 15.3% (52/340) for the kinetin-treated *TgFD9; Ikbkap<sup>Δ20/flox</sup>* mice (light grey bar). No significance

differences were observed in the actual ratio between vehicle-treated and kinetin-treated *TgFD9*; *Ikkap<sup>Δ20/flox</sup>* mice, (P=0.1539)  $\chi^2$ -Test.

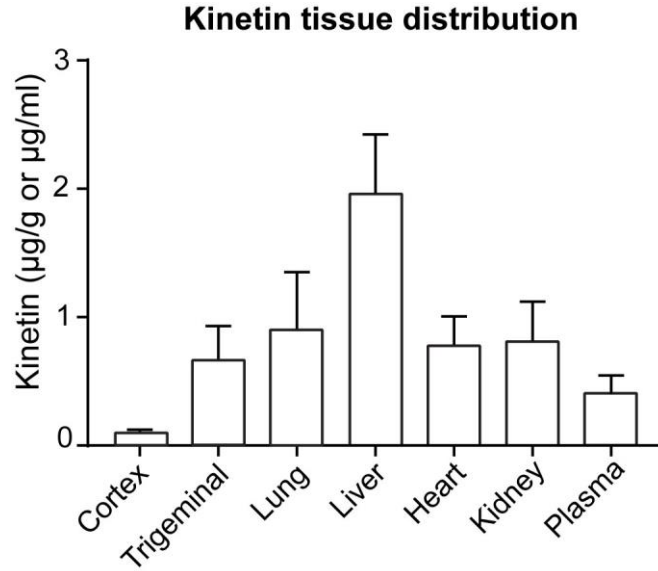

**Figure S3. Kinetin distribution in different tissues.** The levels of compound were measured in cortex, trigeminal ganglia, lung, liver, heart, kidney and plasma from kinetin-treated FD mice (n = 13) using mass spectrometry. Means and s.e.m. are shown.

**Table S1. Fibroblast cell lines from FD patients used in the RNAseq experiment to assess kinetin specificity.**

| <b>Coriell #</b> | <b>Genotype</b>                                | <b>Sex</b> | <b>Age</b> | <b>Race</b> |
|------------------|------------------------------------------------|------------|------------|-------------|
| 0850             | Homozygous for <i>ELP1</i> T>C splice mutation | Male       | 26         | White       |
| 2341             | Homozygous for <i>ELP1</i> T>C splice mutation | Male       | 17         | White       |
| 4589             | Homozygous for <i>ELP1</i> T>C splice mutation | Male       | 16         | White       |
| 2343             | Homozygous for <i>ELP1</i> T>C splice mutation | Female     | 24         | White       |
| 4663             | Homozygous for <i>ELP1</i> T>C splice mutation | Female     | 2          | White       |
| 4899             | Homozygous for <i>ELP1</i> T>C splice mutation | Female     | 12         | White       |
